# Supplementary material for: Structural evolution of Prussian blue analogues A x MFe(CN) 6 upon intercalation of Na and K
Source: Royal Society of Chemistry journal article supplement (doi:10.1039/d4ta07755e), 2025-01-01
Supplement: d4ta07755e1.pdf [file d4ta07755e1.pdf]

Supplementary Information for

## Structural evolution of Prussian Blue Analogue compounds $A_xMFe(CN)_6$ upon intercalation of Na and K

Mingrui Li,<sup>a</sup> Furio Corà,<sup>a,\*</sup>

<sup>a</sup>Department of Chemistry, University College London, London WC1H 0AJ, UK

Table S1. Gamma-point phonon modes calculated in the harmonic approximation for  $FeFe(CN)_6$  at the optimised geometry.

| MODES | EIGV<br>(HARTREE**2) | FREQUENCIES |        | MODES | EIGV<br>(HARTREE**2) | FREQUENCIES |         |
|-------|----------------------|-------------|--------|-------|----------------------|-------------|---------|
|       |                      | (CM**-1)    | (THZ)  |       |                      | (CM**-1)    | (THZ)   |
| 1     | -1.07E-20            | 0           | 0      | 85    | 3.45E-06             | 407.6423    | 12.2208 |
| 2     | -5.62E-21            | 0           | 0      | 86    | 3.46E-06             | 408.1057    | 12.2347 |
| 3     | -5.04E-21            | 0           | 0      | 87    | 3.46E-06             | 408.4221    | 12.2442 |
| 4     | 4.67E-08             | 47.4096     | 1.4213 | 88    | 3.46E-06             | 408.4568    | 12.2452 |
| 5     | 4.91E-08             | 48.618      | 1.4575 | 89    | 3.49E-06             | 409.7107    | 12.2828 |
| 6     | 4.97E-08             | 48.9077     | 1.4662 | 90    | 3.53E-06             | 412.4954    | 12.3663 |
| 7     | 5.31E-08             | 50.5724     | 1.5161 | 91    | 3.54E-06             | 412.8561    | 12.3771 |
| 8     | 5.39E-08             | 50.9619     | 1.5278 | 92    | 3.54E-06             | 412.8691    | 12.3775 |
| 9     | 5.51E-08             | 51.5322     | 1.5449 | 93    | 4.00E-06             | 439.0435    | 13.1622 |
| 10    | 8.09E-08             | 62.4156     | 1.8712 | 94    | 4.02E-06             | 440.0841    | 13.1934 |
| 11    | 9.02E-08             | 65.8992     | 1.9756 | 95    | 4.06E-06             | 441.9799    | 13.2502 |
| 12    | 9.17E-08             | 66.4511     | 1.9922 | 96    | 4.06E-06             | 442.0048    | 13.251  |
| 13    | 9.22E-08             | 66.6458     | 1.998  | 97    | 4.35E-06             | 457.7419    | 13.7228 |
| 14    | 9.45E-08             | 67.4619     | 2.0225 | 98    | 4.35E-06             | 457.936     | 13.7286 |
| 15    | 9.69E-08             | 68.33       | 2.0485 | 99    | 4.39E-06             | 459.7664    | 13.7835 |
| 16    | 1.59E-07             | 87.5173     | 2.6237 | 100   | 4.40E-06             | 460.1053    | 13.7936 |
| 17    | 1.60E-07             | 87.6935     | 2.629  | 101   | 4.40E-06             | 460.2779    | 13.7988 |
| 18    | 1.61E-07             | 88.1759     | 2.6434 | 102   | 4.40E-06             | 460.4367    | 13.8035 |
| 19    | 3.72E-07             | 133.8932    | 4.014  | 103   | 4.41E-06             | 460.8134    | 13.8148 |
| 20    | 3.74E-07             | 134.1583    | 4.022  | 104   | 4.44E-06             | 462.2321    | 13.8574 |
| 21    | 3.74E-07             | 134.2063    | 4.0234 | 105   | 4.44E-06             | 462.361     | 13.8612 |
| 22    | 3.82E-07             | 135.6785    | 4.0675 | 106   | 4.45E-06             | 462.8029    | 13.8745 |
| 23    | 3.85E-07             | 136.1762    | 4.0825 | 107   | 4.46E-06             | 463.5201    | 13.896  |
| 24    | 3.85E-07             | 136.2589    | 4.0849 | 108   | 4.47E-06             | 463.8463    | 13.9058 |
| 25    | 5.25E-07             | 158.9939    | 4.7665 | 109   | 4.49E-06             | 464.975     | 13.9396 |
| 26    | 5.55E-07             | 163.4927    | 4.9014 | 110   | 4.50E-06             | 465.5613    | 13.9572 |
| 27    | 5.55E-07             | 163.5464    | 4.903  | 111   | 4.55E-06             | 468.3133    | 14.0397 |
| 28    | 5.61E-07             | 164.4333    | 4.9296 | 112   | 4.57E-06             | 469.0014    | 14.0603 |
| 29    | 5.63E-07             | 164.7025    | 4.9377 | 113   | 4.60E-06             | 470.7754    | 14.1135 |
| 30    | 5.65E-07             | 165.0115    | 4.9469 | 114   | 4.62E-06             | 471.6086    | 14.1385 |
| 31    | 5.90E-07             | 168.5671    | 5.0535 | 115   | 4.63E-06             | 472.3349    | 14.1602 |
| 32    | 5.90E-07             | 168.603     | 5.0546 | 116   | 4.65E-06             | 473.1864    | 14.1858 |
| 33    | 6.19E-07             | 172.6637    | 5.1763 | 117   | 4.66E-06             | 473.6575    | 14.1999 |
| 34    | 6.25E-07             | 173.5378    | 5.2025 | 118   | 4.67E-06             | 474.3312    | 14.2201 |
| 35    | 6.25E-07             | 173.5669    | 5.2034 | 119   | 4.68E-06             | 474.57      | 14.2273 |
| 36    | 6.32E-07             | 174.5343    | 5.2324 | 120   | 4.72E-06             | 476.8493    | 14.2956 |
| 37    | 6.33E-07             | 174.6438    | 5.2357 | 121   | 4.95E-06             | 488.1237    | 14.6336 |
| 38    | 6.37E-07             | 175.1427    | 5.2506 | 122   | 4.97E-06             | 489.0153    | 14.6603 |
| 39    | 6.54E-07             | 177.4705    | 5.3204 | 123   | 4.98E-06             | 489.5293    | 14.6757 |
| 40    | 6.92E-07             | 182.6304    | 5.4751 | 124   | 4.98E-06             | 489.5489    | 14.6763 |
| 41    | 6.93E-07             | 182.6738    | 5.4764 | 125   | 4.99E-06             | 490.4121    | 14.7022 |
| 42    | 6.93E-07             | 182.6951    | 5.4771 | 126   | 5.00E-06             | 490.4971    | 14.7047 |
| 43    | 7.03E-07             | 183.9775    | 5.5155 | 127   | 5.00E-06             | 490.6757    | 14.7101 |
| 44    | 7.03E-07             | 183.9987    | 5.5161 | 128   | 5.00E-06             | 490.8568    | 14.7155 |
| 45    | 7.03E-07             | 184.0202    | 5.5168 | 129   | 5.92E-06             | 533.7631    | 16.0018 |
| 46    | 9.06E-07             | 208.918     | 6.2632 | 130   | 5.92E-06             | 533.8784    | 16.0053 |
| 47    | 9.41E-07             | 212.9412    | 6.3838 | 131   | 5.93E-06             | 534.5109    | 16.0242 |
| 48    | 9.42E-07             | 213.0342    | 6.3866 | 132   | 5.94E-06             | 534.7074    | 16.0301 |
| 49    | 9.61E-07             | 215.1826    | 6.451  | 133   | 5.94E-06             | 534.8657    | 16.0349 |
| 50    | 9.62E-07             | 215.305     | 6.4547 | 134   | 5.98E-06             | 536.5169    | 16.0844 |
| 51    | 9.87E-07             | 218.0018    | 6.5355 | 135   | 5.98E-06             | 536.6948    | 16.0897 |
| 52    | 1.19E-06             | 239.5714    | 7.1822 | 136   | 5.99E-06             | 537.0481    | 16.1003 |
| 53    | 1.24E-06             | 244.4695    | 7.329  | 137   | 7.00E-06             | 580.6869    | 17.4086 |
| 54    | 1.26E-06             | 245.9676    | 7.3739 | 138   | 7.00E-06             | 580.7966    | 17.4118 |
| 55    | 1.31E-06             | 250.8097    | 7.5191 | 139   | 7.01E-06             | 581.2311    | 17.4249 |
| 56    | 1.31E-06             | 251.0941    | 7.5276 | 140   | 7.01E-06             | 581.2703    | 17.426  |
| 57    | 1.32E-06             | 251.7849    | 7.5483 | 141   | 7.02E-06             | 581.3504    | 17.4284 |

|    |          |          |         |     |          |          |         |
|----|----------|----------|---------|-----|----------|----------|---------|
| 58 | 1.32E-06 | 251.9796 | 7.5542  | 142 | 7.02E-06 | 581.6145 | 17.4364 |
| 59 | 1.32E-06 | 252.0365 | 7.5559  | 143 | 7.05E-06 | 582.6415 | 17.4672 |
| 60 | 1.33E-06 | 252.9407 | 7.583   | 144 | 7.07E-06 | 583.5355 | 17.494  |
| 61 | 1.39E-06 | 258.3548 | 7.7453  | 145 | 1.07E-04 | 2274.82  | 68.1974 |
| 62 | 1.41E-06 | 260.4973 | 7.8095  | 146 | 1.07E-04 | 2274.914 | 68.2002 |
| 63 | 1.47E-06 | 265.9137 | 7.9719  | 147 | 1.08E-04 | 2275.066 | 68.2048 |
| 64 | 1.57E-06 | 275.2894 | 8.253   | 148 | 1.08E-04 | 2276.253 | 68.2404 |
| 65 | 1.57E-06 | 275.3801 | 8.2557  | 149 | 1.08E-04 | 2276.534 | 68.2488 |
| 66 | 1.61E-06 | 278.0197 | 8.3348  | 150 | 1.08E-04 | 2280.682 | 68.3731 |
| 67 | 1.61E-06 | 278.4152 | 8.3467  | 151 | 1.08E-04 | 2281.009 | 68.3829 |
| 68 | 1.62E-06 | 279.2259 | 8.371   | 152 | 1.08E-04 | 2281.089 | 68.3853 |
| 69 | 1.62E-06 | 279.2644 | 8.3721  | 153 | 1.08E-04 | 2281.285 | 68.3912 |
| 70 | 1.89E-06 | 301.9647 | 9.0527  | 154 | 1.08E-04 | 2281.832 | 68.4076 |
| 71 | 1.89E-06 | 302.063  | 9.0556  | 155 | 1.08E-04 | 2281.885 | 68.4092 |
| 72 | 1.90E-06 | 302.3213 | 9.0634  | 156 | 1.08E-04 | 2282.027 | 68.4134 |
| 73 | 2.31E-06 | 333.4105 | 9.9954  | 157 | 1.08E-04 | 2282.197 | 68.4185 |
| 74 | 2.34E-06 | 335.8031 | 10.0671 | 158 | 1.08E-04 | 2282.295 | 68.4215 |
| 75 | 2.34E-06 | 335.8699 | 10.0691 | 159 | 1.08E-04 | 2282.307 | 68.4218 |
| 76 | 2.35E-06 | 336.2011 | 10.0791 | 160 | 1.08E-04 | 2282.644 | 68.4319 |
| 77 | 2.37E-06 | 337.5001 | 10.118  | 161 | 1.08E-04 | 2282.824 | 68.4373 |
| 78 | 2.37E-06 | 337.8883 | 10.1296 | 162 | 1.10E-04 | 2304.17  | 69.0773 |
| 79 | 2.85E-06 | 370.4919 | 11.1071 | 163 | 1.10E-04 | 2304.197 | 69.0781 |
| 80 | 2.85E-06 | 370.6955 | 11.1132 | 164 | 1.10E-04 | 2304.275 | 69.0804 |
| 81 | 2.85E-06 | 370.7507 | 11.1148 | 165 | 1.11E-04 | 2313.326 | 69.3518 |
| 82 | 2.90E-06 | 373.7281 | 11.2041 | 166 | 1.11E-04 | 2313.407 | 69.3542 |
| 83 | 2.91E-06 | 374.1707 | 11.2174 | 167 | 1.11E-04 | 2313.787 | 69.3656 |
| 84 | 2.91E-06 | 374.1841 | 11.2178 | 168 | 1.11E-04 | 2316.681 | 69.4524 |

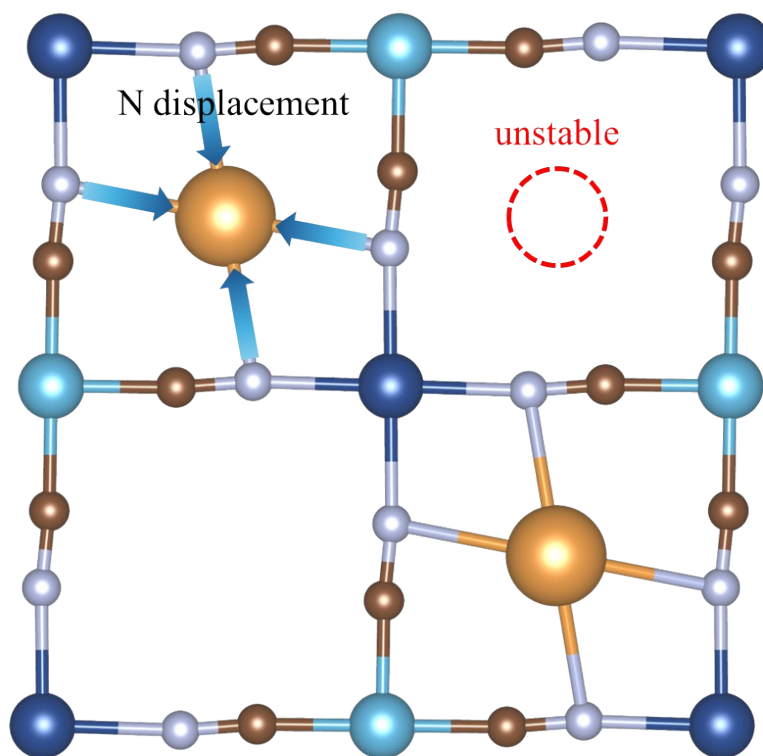

Figure S1. Schematic of stable and unstable position for intercalant A induced by N-displacement during 2-D distortion.

Example input file.

All calculations have been performed with the code CRYSTAL17 available from [www.crystal.unito.it](http://www.crystal.unito.it). An example input file, including basis set and computational parameters, is included below:

```
Prussian Blue, octah
CRYSTAL
0 0 0
1
10.052904 10.004958 10.051974 89.271492 87.178955 90.676559
56
125 0.000001 0.500000 0.000000
125 0.500001 0.500000 0.500000
125 0.000001 0.000001 0.500001
125 0.500000 0.000001 0.000001
126 0.000001 0.000001 0.000001
126 0.500001 0.000001 0.500001
126 0.500000 0.500000 0.000000
126 0.000000 0.500000 0.500000
6 0.040355 0.183069 0.972897
6 0.540488 0.183058 0.472961
6 0.973068 0.316924 0.540494
6 0.472780 0.316940 0.040474
6 0.959645 0.816931 0.027103
6 0.459512 0.816942 0.527039
6 0.026932 0.683076 0.459506
6 0.527220 0.683060 0.959526
6 0.819666 0.035228 0.969295
6 0.319681 0.035308 0.469305
6 0.969084 0.464779 0.319721
6 0.469256 0.464818 0.819692
6 0.180334 0.964772 0.030705
6 0.680319 0.964692 0.530695
6 0.030916 0.535221 0.680279
6 0.530744 0.535182 0.180308
7 0.062145 0.297514 0.960036
7 0.562352 0.297494 0.460124
7 0.960244 0.202472 0.562309
7 0.459908 0.202486 0.062264
7 0.937855 0.702486 0.039964
7 0.437648 0.702506 0.539876
7 0.039756 0.797528 0.437691
7 0.540092 0.797514 0.937736
6 0.967459 0.030779 0.183871
6 0.467554 0.030746 0.683876
6 0.683845 0.469007 0.967509
6 0.183873 0.469239 0.467379
6 0.032541 0.969221 0.816129
6 0.532446 0.969254 0.316124
6 0.316155 0.530993 0.032491
6 0.816127 0.530761 0.532621
7 0.707344 0.056606 0.954371
7 0.207346 0.056327 0.454075
7 0.954112 0.443375 0.207423
7 0.454381 0.443420 0.707377
7 0.292656 0.943394 0.045629
7 0.792654 0.943673 0.545925
7 0.045888 0.556625 0.792577
```

|   |          |          |          |
|---|----------|----------|----------|
| 7 | 0.545619 | 0.556580 | 0.292623 |
| 7 | 0.950618 | 0.048967 | 0.297926 |
| 7 | 0.450800 | 0.048927 | 0.797940 |
| 7 | 0.798006 | 0.451530 | 0.950520 |
| 7 | 0.297967 | 0.451133 | 0.450761 |
| 7 | 0.049382 | 0.951033 | 0.702074 |
| 7 | 0.549200 | 0.951073 | 0.202060 |
| 7 | 0.201994 | 0.548470 | 0.049480 |
| 7 | 0.702034 | 0.548867 | 0.549239 |

OPTGEOM

MAXTRADIUS

0.5

ENDOPT

END

26 8

0 0 8 2.0 1.0

315379.0 0.000227

45690.0 0.0019

9677.3 0.0111

2520.88 0.0501

759.746 0.1705

262.964 0.36924

102.801 0.4033

42.9733 0.1434

0 1 6 8.0 1.0

798.262 -0.0052 0.00850

191.162 -0.068 0.0608

63.6885 -0.1314 0.2114

25.3625 0.2517 0.3944

10.7338 0.6433 0.398

3.764 0.2825 0.2251

0 1 4 8.0 1.0

48.1434 0.0122 -0.0215

17.4579 -0.2278 -0.085

6.9972 -0.8801 0.201

3.0791 0.9755 1.3024

0 1 1 0.0 1.0

1.3137 1.0 1.0

0 1 1 0.0 1.0

0.5625 1.0 1.0

0 1 1 0.0 1.0

0.20 1.0 1.0

0 3 4 6.0 1.0

30.4821 0.0583

8.692 0.2591

3.1008 0.5162

1.1709 0.5656

0 3 1 0.0 1.0

0.4345 1.0

126 8

0 0 8 2.0 1.0

315379.0 0.000227

45690.0 0.0019

9677.3 0.0111

2520.88 0.0501

759.746 0.1705

262.964 0.36924

102.801 0.4033

42.9733 0.1434

0 1 6 8.0 1.0

798.262 -0.0052 0.00850  
191.162 -0.068 0.0608  
63.6885 -0.1314 0.2114  
25.3625 0.2517 0.3944  
10.7338 0.6433 0.398  
3.764 0.2825 0.2251  
0 1 4 8.0 1.0  
48.1434 0.0122 -0.0215  
17.4579 -0.2278 -0.085  
6.9972 -0.8801 0.201  
3.0791 0.9755 1.3024  
0 1 1 0.0 1.0  
1.3137 1.0 1.0  
0 1 1 0.0 1.0  
0.5625 1.0 1.0  
0 1 1 0.0 1.0  
0.20 1.0 1.0  
0 3 4 5.0 1.0  
30.4821 0.0583  
8.692 0.2591  
3.1008 0.5162  
1.1709 0.5656  
0 3 1 0.0 1.0  
0.4345 1.0  
25 7  
0 0 8 2.0 1.0  
292601.0 0.000227  
42265.0 0.0019  
8947.29 0.0111  
2330.32 0.0501  
702.047 0.1705  
242.907 0.3691  
94.955 0.4035  
39.5777 0.1437  
0 1 6 8.0 1.0  
732.14 -0.0053 0.0086  
175.551 -0.0673 0.0612  
58.5093 -0.1293 0.2135  
23.129 0.2535 0.4018  
9.7536 0.6345 0.4012  
3.4545 0.2714 0.2222  
0 1 4 8.0 1.0  
38.389 0.0157 -0.0311  
15.4367 -0.2535 -0.0969  
6.1781 -0.8648 0.2563  
2.8235 0.9337 1.6552  
0 1 1 0 1.0  
1.2086 1.0 1.0  
0 1 1 0.0 1.0  
0.4986 1.0 1.0  
0 3 4 5.0 1.0  
22.5929 0.0708  
6.1674 0.3044  
2.0638 0.5469  
0.7401 0.5102  
0 3 1 0.0 1.0  
0.249 1.0  
125 7  
0 0 8 2.0 1.0  
292601.0 0.000227

42265.0 0.0019  
8947.29 0.0111  
2330.32 0.0501  
702.047 0.1705  
242.907 0.3691  
94.955 0.4035  
39.5777 0.1437  
0 1 6 8.0 1.0  
732.14 -0.0053 0.0086  
175.551 -0.0673 0.0612  
58.5093 -0.1293 0.2135  
23.129 0.2535 0.4018  
9.7536 0.6345 0.4012  
3.4545 0.2714 0.2222  
0 1 4 8.0 1.0  
38.389 0.0157 -0.0311  
15.4367 -0.2535 -0.0969  
6.1781 -0.8648 0.2563  
2.8235 0.9337 1.6552  
0 1 1 0 1.0  
1.2086 1.0 1.0  
0 1 1 0.0 1.0  
0.4986 1.0 1.0  
0 3 4 4.0 1.0  
22.5929 0.0708  
6.1674 0.3044  
2.0638 0.5469  
0.7401 0.5102  
0 3 1 0.0 1.0  
0.249 1.0  
11 5  
0 0 8 2. 1.  
56700. 0.000225  
8060. 0.00191  
1704. 0.0105  
443.6 0.05006  
133.1 0.1691  
45.8 0.3658  
17.75 0.3998  
7.38 0.1494  
0 1 5 8. 1.  
119.0 -0.00673 0.00803  
25.33 -0.0798 0.0639  
7.80 -0.0793 0.2074  
3.00 0.3056 0.3398  
1.289 0.5639 0.3726  
0 1 1 0. 1.  
0.543731341992 1. 1.  
0 1 1 0. 1.  
0.215680639594 1. 1.  
0 3 1 0. 1.  
0.778535164031 1.  
19 6  
0 0 8 2. 1.  
172500. 0.000220  
24320. 0.00192  
5140. 0.01109  
1343.9 0.04992  
404.5 0.1702  
139.4 0.3679

54.39 0.4036  
 22.71 0.1459  
 0 1 6 8. 1.  
 402.0 -0.00603 0.00841  
 93.5 -0.0805 0.0602  
 30.75 -0.1094 0.2117  
 11.91 0.258 0.3726  
 5.167 0.684 0.4022  
 1.582 0.399 0.186  
 0 1 5 8. 1.  
 17.35 -0.0074 -0.0321  
 7.55 -0.129 -0.062  
 2.939 -0.6834 0.1691  
 1.19 1.08 1.500  
 0.674 1.03 1.060  
 0 1 1 0. 1.  
 0.389 1. 1.  
 0 1 1 0. 1.  
 0.216 1. 1.  
 0 3 3 0. 1.  
 3.94 0.160  
 1.072 0.313  
 0.394 0.406  
 6 5  
 0 0 6 2. 1.  
     4563.2400000    0.00196665  
     682.0240000    0.0152306  
     154.9730000    0.0761269  
     44.4553000    0.2608010  
     13.0290000    0.6164620  
     1.8277300    0.2210060  
 0 1 3 5. 1.  
     20.9642000    0.1146600    0.0402487  
     4.8033100    0.9199990    0.2375940  
     1.4593300    -0.00303068    0.8158540  
 0 1 1 0. 1.  
     0.4834560    1.0000000    1.0000000  
 0 1 1 0. 1.  
     0.1455850    1.0000000    1.0000000  
 0 3 1 0. 1.  
     0.6260000    1.0000000  
 7 5  
 0 0 6 2. 1.  
     6293.4800000    0.00196979  
     949.0440000    0.0149613  
     218.7760000    0.0735006  
     63.6916000    0.2489370  
     18.8282000    0.6024600  
     2.7202300    0.2562020  
 0 1 3 5. 1.  
     30.6331000    0.1119060    0.0383119  
     7.0261400    0.9216660    0.2374030  
     2.1120500    -0.00256919    0.8175920  
 0 1 1 0. 1.  
     0.6840090    1.0000000    1.0000000  
 0 1 1 0. 1.  
     0.2008780    1.0000000    1.0000000  
 0 3 1 0. 1.  
     0.9130000    1.0000000  
 8 5

|                                 |             |           |  |
|---------------------------------|-------------|-----------|--|
| 0 0 6 2. 1.                     |             |           |  |
| 8588.500000                     | 0.00189515  |           |  |
| 1297.230000                     | 0.0143859   |           |  |
| 299.296000                      | 0.0707320   |           |  |
| 87.3771000                      | 0.2400010   |           |  |
| 25.6789000                      | 0.5947970   |           |  |
| 3.7400400                       | 0.2808020   |           |  |
| 0 1 3 6. 1.                     |             |           |  |
| 42.1175000                      | 0.1138890   | 0.0365114 |  |
| 9.6283700                       | 0.9208110   | 0.2371530 |  |
| 2.8533200                       | -0.00327447 | 0.8197020 |  |
| 0 1 1 0. 1.                     |             |           |  |
| 0.9056610                       | 1.0000000   | 1.0000000 |  |
| 0 1 1 0. 1.                     |             |           |  |
| 0.2556110                       | 1.0000000   | 1.0000000 |  |
| 0 3 1 0. 1.                     |             |           |  |
| 1.2920000                       | 1.0000000   |           |  |
| 1 4                             |             |           |  |
| 0 0 3 1. 1.                     |             |           |  |
| 33.8650000                      | 0.0254938   |           |  |
| 5.0947900                       | 0.1903730   |           |  |
| 1.1587900                       | 0.8521610   |           |  |
| 0 0 1 0. 1.                     |             |           |  |
| 0.3258400                       | 1.0000000   |           |  |
| 0 0 1 0. 1.                     |             |           |  |
| 0.1027410                       | 1.0000000   |           |  |
| 0 2 1 0. 1.                     |             |           |  |
| 0.7500000                       | 1.0000000   |           |  |
| 99 0                            |             |           |  |
| END                             |             |           |  |
| DFT                             |             |           |  |
| SPIN                            |             |           |  |
| PBE0                            |             |           |  |
| END                             |             |           |  |
| ATOMSPIN                        |             |           |  |
| 8                               |             |           |  |
| 1 1 2 1 3 1 4 1 5 1 6 1 7 1 8 1 |             |           |  |
| TOLINTEG                        |             |           |  |
| 7 7 7 7 14                      |             |           |  |
| SHRINK                          |             |           |  |
| 4 4                             |             |           |  |
| TOLDEE                          |             |           |  |
| 7                               |             |           |  |
| SPINLOCK                        |             |           |  |
| 20 -1                           |             |           |  |
| THREDIIS                        |             |           |  |
| 0.001                           |             |           |  |
| MAXCYCLE                        |             |           |  |
| 500                             |             |           |  |
| FMIXING                         |             |           |  |
| 95                              |             |           |  |
| END                             |             |           |  |
